# Supplementary material for: Understanding Individual and Organizational Level Representation: The Case of Parental Involvement in Schools
Source: Oxford University Press journal article supplement (doi:10.1093/jopart/mux036), 2017-09-02
Supplement: mux036_suppl_appendix_ms_2016315.docx [file mux036_suppl_appendix_ms_2016315.docx]

| **Appendix Table 1: The Relationship Between Teacher-Student Racial/Ethnic Mismatch and Parental Involvement (OLS, with Classroom Fixed Effects), Full Results** | | | | | |
| --- | --- | --- | --- | --- | --- |
|  | (1) | (2) | (3) | (4) | (5) |
|  | Contact | Meeting | Return Call | Conference, Teacher Report | Conference, Parent Report |
|  |  |  |  |  |  |
| **Nonmatch** | **-0.062**** | **-0.034** | **-0.023** | **-0.008** | **-0.051*** |
|  | **(0.031)** | **(0.027)** | **(0.017)** | **(0.025)** | **(0.026)** |
| Black student | -0.018 | -0.063* | 0.001 | -0.058* | 0.055* |
|  | (0.044) | (0.036) | (0.027) | (0.033) | (0.031) |
| Hispanic student | 0.032 | -0.015 | 0.008 | -0.008 | 0.034 |
|  | (0.033) | (0.030) | (0.017) | (0.025) | (0.027) |
| Female student | 0.009 | 0.004 | 0.004 | -0.001 | -0.017** |
|  | (0.012) | (0.012) | (0.006) | (0.007) | (0.007) |
| English not spoken at home | -0.080 | -0.129 | -0.048 | 0.042 | -0.042 |
|  | (0.065) | (0.118) | (0.057) | (0.049) | (0.044) |
| Child is twin | 0.022 | 0.078 | 0.034 | 0.015 | -0.036 |
|  | (0.116) | (0.082) | (0.039) | (0.044) | (0.046) |
| Parent expects child to attend college | 0.007 | 0.019 | -0.003 | -0.001 | 0.003 |
|  | (0.019) | (0.021) | (0.010) | (0.011) | (0.012) |
| Maternal depression | -0.015 | -0.038* | -0.011 | -0.018 | -0.016 |
|  | (0.022) | (0.021) | (0.013) | (0.014) | (0.013) |
| Child has IEP | -0.007 | 0.032 | -0.006 | 0.012 | 0.036** |
|  | (0.027) | (0.023) | (0.017) | (0.016) | (0.014) |
| Age (in months) | -0.000 | -0.000 | -0.000 | -0.000 | -0.001 |
|  | (0.002) | (0.002) | (0.001) | (0.001) | (0.001) |
| Disability | 0.066*** | 0.029 | 0.027*** | 0.014 | 0.010 |
|  | (0.018) | (0.018) | (0.009) | (0.011) | (0.012) |
| Income 20k-35k | -0.000 | 0.002 | 0.003 | -0.004 | 0.004 |
|  | (0.023) | (0.019) | (0.012) | (0.012) | (0.014) |
| Income 35k-75k | 0.034* | 0.016 | 0.024* | 0.015 | -0.002 |
|  | (0.021) | (0.020) | (0.012) | (0.012) | (0.011) |
| Income 75k+ | 0.060*** | 0.033 | 0.022* | 0.027** | -0.005 |
|  | (0.022) | (0.022) | (0.013) | (0.012) | (0.013) |
| Parent education HS degree | 0.029 | 0.046 | 0.065** | 0.008 | 0.022 |
|  | (0.033) | (0.035) | (0.028) | (0.025) | (0.034) |
| **Appendix Table 1, continued: The Relationship Between Teacher-Student Racial/Ethnic Mismatch and Parental Involvement (OLS, with Classroom Fixed Effects), Full Results** | | | | | |
|  | (1) | (2) | (3) | (4) | (5) |
|  | Contact | Meeting | Return Call | Conference, Teacher Report | Conference, Parent Report |
| Parent education some college | 0.104*** | 0.073** | 0.081*** | 0.030 | 0.035 |
|  | (0.033) | (0.036) | (0.028) | (0.025) | (0.034) |
| Parent education college + | 0.176*** | 0.104*** | 0.092*** | 0.053** | 0.057 |
|  | (0.035) | (0.038) | (0.028) | (0.027) | (0.035) |
| Parent one FT employed | -0.033 | -0.017 | 0.014 | 0.027 | -0.004 |
|  | (0.034) | (0.031) | (0.023) | (0.023) | (0.019) |
| Parent one PT employed | 0.019 | 0.017 | 0.013 | 0.030 | -0.003 |
|  | (0.033) | (0.030) | (0.023) | (0.024) | (0.020) |
| Parent one not in labor force | 0.021 | 0.016 | 0.012 | 0.038 | -0.002 |
|  | (0.033) | (0.032) | (0.023) | (0.023) | (0.020) |
| Parent two FT employed | 0.036 | 0.036 | 0.022 | 0.021 | 0.015 |
|  | (0.029) | (0.025) | (0.019) | (0.019) | (0.017) |
| Parent two PT employed | 0.027 | -0.001 | 0.009 | 0.007 | 0.010 |
|  | (0.037) | (0.039) | (0.024) | (0.022) | (0.025) |
| Parent two not in labor force | 0.035 | 0.020 | -0.011 | 0.028 | 0.005 |
|  | (0.047) | (0.041) | (0.030) | (0.028) | (0.027) |
| Parents married | 0.044 | 0.028 | 0.013 | 0.028 | -0.008 |
|  | (0.029) | (0.025) | (0.018) | (0.019) | (0.018) |
| Household size | -0.036*** | -0.032*** | -0.013*** | -0.012*** | -0.005 |
|  | (0.006) | (0.006) | (0.004) | (0.003) | (0.004) |
| TANF receipt | -0.123*** | -0.084** | -0.053* | -0.029 | -0.009 |
|  | (0.044) | (0.039) | (0.030) | (0.029) | (0.030) |
| Constant | 0.785*** | 0.914*** | 0.908*** | 0.906*** | 0.961*** |
|  | (0.157) | (0.142) | (0.078) | (0.088) | (0.090) |
| Observations | 12,980 | 10,330 | 11,820 | 13,170 | 13,530 |
| R-squared | 0.598 | 0.659 | 0.610 | 0.643 | 0.606 |
| Robust standard errors, clustered at school level, in parentheses; All regressions are weighted by ECLS-K provided weights and condition on classroom fixed effects. *** p<0.01, ** p<0.05, * p<0.1. | | | | | |

| **Appendix Table 2: The Relationship Between Teacher-Student Racial/Ethnic Mismatch and Parental Involvement, Linear Probability on Restricted Sample and Conditional Logit Models** | | | | | | | | | | | |
| --- | --- | --- | --- | --- | --- | --- | --- | --- | --- | --- | --- |
|  | LPM, logit sample | | | | |  | Conditional Logistic | | | | |
|  | (1) | (2) | (3) | (4) | (5) |  | (6) | (7) | (8) | (9) | (10) |
|  | Contact | Meeting | Return Call | Conference, Teacher Report | Conference, Parent Report |  | Contact | Meeting | Return Call | Conference, Teacher Report | Conference, Parent Report |
|  |  |  |  |  |  |  |  |  |  |  |  |
| Nonmatch | -0.041 | -0.019 | -0.036 | -0.002 | -0.128* |  | -0.127 | -0.050 | -0.273 | -0.020 | -0.525** |
|  | (0.050) | (0.064) | (0.082) | (0.058) | (0.070) |  | (0.172) | (0.242) | (0.365) | (0.287) | (0.232) |
| Black student | -0.132** | -0.179** | -0.169* | -0.278*** | 0.210** |  | -0.473** | -0.594** | -0.637 | -1.095*** | 0.791*** |
|  | (0.063) | (0.070) | (0.087) | (0.067) | (0.088) |  | (0.206) | (0.280) | (0.408) | (0.318) | (0.273) |
| Hispanic student | -0.047 | -0.102 | -0.117 | -0.090 | 0.083 |  | -0.178 | -0.411 | -0.420 | -0.480 | 0.339 |
|  | (0.053) | (0.072) | (0.096) | (0.067) | (0.081) |  | (0.181) | (0.265) | (0.405) | (0.328) | (0.255) |
| N | 6,860 | 3,130 | 1,800 | 2,710 | 3,040 |  | 6,860 | 3,130 | 1,800 | 2,710 | 3,040 |
| R-squared | 0.243 | 0.280 | 0.297 | 0.300 | 0.188 |  |  |  |  |  |  |
| Notes: Standard errors are clustered by school. All regressions are weighted by ECLS-K provided weights and condition on classroom fixed effects and the full set of controls described in the text and summarized in Table 1. Logit models are estimated using the Chamberlain (1980) conditional (FE) logit estimator, which drops units for which there is no variation in the dependent variable, and logit coefficients are reported. LPM = Linear Probability Model. *** p<0.01, ** p<0.05, * p<0.1. | | | | | | | | | | | |

| **Appendix Table 3: The Relationship Between Percent of Teachers at the School of the Same Race/Ethnicity as the Student and Parental Involvement (OLS, with School-by-Year Fixed Effects), Full Results** | | | | |
| --- | --- | --- | --- | --- |
|  | (1) | (2) | (3) | (4) | | (5) |
|  | Contact | Meeting | Return Call | Conference, Teacher Report | | Conference, Parent Report |
|  |  |  |  |  | |  |
| Percent same race | 0.000 | -0.001 | 0.000 | -0.000 | | -0.001 |
|  | (0.001) | (0.001) | (0.000) | (0.000) | | (0.001) |
| Nonmatch | -0.011 | -0.036 | -0.019 | -0.031* | | -0.012 |
|  | (0.041) | (0.032) | (0.019) | (0.016) | | (0.020) |
| Black student | 0.003 | -0.065 | -0.020 | -0.071* | | -0.042 |
|  | (0.060) | (0.065) | (0.030) | (0.039) | | (0.062) |
| Hispanic student | -0.001 | -0.038 | 0.009 | -0.032 | | -0.101 |
|  | (0.053) | (0.060) | (0.023) | (0.032) | | (0.062) |
| Female | 0.003 | 0.014 | 0.006 | 0.005 | | -0.009 |
|  | -0.106 | -0.276*** | -0.024 | 0.002 | | -0.093* |
| English not spoken at home | (0.110) | (0.106) | (0.069) | (0.024) | | (0.055) |
|  | 0.084 | 0.125 | 0.025 | 0.014 | | -0.009 |
| Child is twin | (0.065) | (0.102) | (0.029) | (0.023) | | (0.050) |
|  | -0.004 | -0.001 | -0.004 | 0.003 | | 0.001 |
| Parent expects child to attend college | (0.021) | (0.019) | (0.009) | (0.010) | | (0.012) |
|  | -0.040 | -0.026 | -0.010 | -0.025 | | -0.016 |
| Maternal depression | (0.026) | (0.025) | (0.013) | (0.016) | | (0.015) |
|  | 0.016 | 0.022 | -0.001 | 0.024 | | 0.024 |
| Child has IEP | (0.026) | (0.023) | (0.015) | (0.016) | | (0.018) |
|  | -0.106 | -0.276*** | -0.024 | 0.002 | | -0.093* |
| Age (in months) | -0.000 | -0.000 | -0.000 | -0.000 | | -0.000 |
|  | (0.002) | (0.002) | (0.001) | (0.001) | | (0.001) |
| Disability | 0.054*** | 0.040** | 0.014* | 0.003 | | 0.008 |
|  | (0.019) | (0.017) | (0.008) | (0.010) | | (0.012) |
| Income 20k-35k | 0.009 | -0.025 | -0.011 | 0.013 | | -0.001 |
|  | (0.022) | (0.022) | (0.011) | (0.013) | | (0.014) |
| Income 35k-75k | 0.014 | 0.005 | -0.003 | 0.022 | | 0.002 |
|  | (0.022) | (0.020) | (0.012) | (0.013) | | (0.011) |
| Income 75k+ | 0.051** | 0.012 | -0.003 | 0.021 | | -0.017 |
|  | (0.024) | (0.024) | (0.012) | (0.015) | | (0.014) |
| Parent education HS degree | 0.029 | 0.044 | 0.090*** | 0.027 | | 0.020 |
|  | (0.040) | (0.042) | (0.035) | (0.033) | | (0.043) |
| Parent education some college | 0.119*** | 0.121*** | 0.120*** | 0.059* | | 0.046 |
|  | (0.039) | (0.042) | (0.035) | (0.033) | | (0.042) |
| Parent education college + | 0.167*** | 0.125*** | 0.127*** | 0.066* | | 0.069 |
|  | (0.041) | (0.047) | (0.036) | (0.034) | | (0.043) |
| **Appendix Table 3, continued: The Relationship Between Percent of Teachers at the School of the Same Race/Ethnicity as the Student and Parental Involvement (OLS, with School-by-Year Fixed Effects), Full Results** | | | | | | |
|  | (1) | (2) | (3) | (4) | | (5) |
|  | Contact | Meeting | Return Call | Conference, Teacher Report | | Conference, Parent Report |
| Parent one FT employed | -0.039 | 0.017 | 0.021 | 0.038 | | -0.031* |
|  | (0.035) | (0.039) | (0.024) | (0.027) | | (0.017) |
| Parent one PT employed | 0.005 | 0.052 | 0.021 | 0.030 | | -0.033* |
|  | (0.035) | (0.037) | (0.024) | (0.027) | | (0.017) |
| Parent one not in labor force | 0.013 | 0.024 | 0.022 | 0.052* | | -0.035* |
|  | (0.035) | (0.037) | (0.024) | (0.027) | | (0.018) |
| Parent two FT employed | -0.011 | 0.013 | -0.006 | 0.000 | | -0.009 |
|  | (0.032) | (0.033) | (0.017) | (0.021) | | (0.024) |
| Parent two PT employed | -0.056 | 0.034 | -0.009 | -0.012 | | -0.008 |
|  | (0.044) | (0.044) | (0.027) | (0.028) | | (0.028) |
| Parent two not in labor force | -0.067 | -0.070 | -0.072** | 0.003 | | -0.052 |
|  | (0.049) | (0.049) | (0.033) | (0.031) | | (0.039) |
| Parents married | 0.101*** | 0.042 | 0.035* | 0.042* | | 0.002 |
|  | (0.033) | (0.033) | (0.019) | (0.024) | | (0.024) |
| Household size | -0.041*** | -0.024*** | -0.013*** | -0.010*** | | 0.001 |
|  | (0.007) | (0.007) | (0.004) | (0.004) | | (0.004) |
| TANF receipt | -0.111** | -0.071 | -0.064* | -0.031 | | -0.007 |
|  | (0.045) | (0.049) | (0.039) | (0.035) | | (0.029) |
| Female teacher | 0.026 | 0.055 | -0.027 | 0.046 | | -0.003 |
|  | (0.052) | (0.040) | (0.019) | (0.035) | | (0.020) |
| Teacher years of experience | 0.001 | -0.001 | 0.000 | 0.001 | | -0.000 |
|  | (0.001) | (0.001) | (0.000) | (0.001) | | (0.000) |
| Teacher has bachelors | -0.245 | 0.180 | -0.026 | -0.012 | | -0.007 |
|  | (0.152) | (0.249) | (0.016) | (0.018) | | (0.014) |
| Teacher has more than bachelors | -0.246 | 0.199 | -0.014 | -0.014 | | -0.013 |
|  | (0.153) | (0.248) | (0.016) | (0.019) | | (0.015) |
| Teacher is Hispanic | 0.078 | -0.002 | 0.031 | 0.039 | | 0.007 |
|  | (0.062) | (0.038) | (0.028) | (0.024) | | (0.028) |
| Teacher is black | 0.154*** | 0.094 | 0.000 | 0.076* | | -0.002 |
|  | (0.056) | (0.059) | (0.042) | (0.043) | | (0.045) |
| Constant | 0.960*** | 0.667** | 0.921*** | 0.884*** | | 1.050*** |
|  | (0.229) | (0.300) | (0.091) | (0.107) | | (0.113) |
| Observations | 5,730 | 4,420 | 5,230 | 5,810 | | 5,960 |
| R-squared | 0.310 | 0.349 | 0.337 | 0.345 | | 0.363 |
| Robust standard errors, clustered at school level, in parentheses; All regressions are weighted by ECLS-K provided weights and condition on school-by-year fixed effects. *** p<0.01, ** p<0.05, * p<0.1. | | | | | | |

| **Appendix Table 4:**  **The Relationship Between Percent of Teachers at the School of the Same Race/Ethnicity as the Student and Parental Involvement, Linear Probability on Restricted Sample and Conditional Logit Models** | | | | | | | | | | | |
| --- | --- | --- | --- | --- | --- | --- | --- | --- | --- | --- | --- |
|  | LPM, logit sample | | | | |  | Conditional Logistic | | | | |
|  | (1) | (2) | (3) | (4) | (5) |  | (6) | (7) | (8) | (9) | (10) |
|  | Contact | Meeting | Return Call | Conference, Teacher Report | Conference, Parent Report |  | Contact | Meeting | Return Call | Conference, Teacher Report | Conference, Parent Report |
|  |  |  |  |  |  |  |  |  |  |  |  |
| Percent same race | -0.000 | -0.001 | 0.001 | -0.001 | 0.000 |  | -0.003 | -0.003 | 0.005 | -0.005 | 0.001 |
|  | (0.001) | (0.001) | (0.001) | (0.001) | (0.001) |  | (0.004) | (0.006) | (0.012) | (0.007) | (0.006) |
| Nonmatch | -0.011 | 0.005 | 0.044 | -0.013 | -0.022 |  | 0.006 | 0.057 | 0.878 | 0.232 | -0.164 |
|  | (0.038) | (0.043) | (0.044) | (0.038) | (0.038) |  | (0.197) | (0.260) | (0.620) | (0.407) | (0.312) |
| Black student | -0.128** | -0.206*** | -0.145* | -0.236*** | 0.069 |  | -0.920** | -1.114** | -1.533 | -2.058*** | 0.315 |
|  | (0.059) | (0.065) | (0.079) | (0.051) | (0.095) |  | (0.396) | (0.497) | (1.062) | (0.652) | (0.426) |
| Hispanic Student | -0.097 | -0.078 | -0.080 | -0.099** | 0.018 |  | -0.720* | -0.458 | -1.293 | -1.290* | 0.004 |
|  | (0.059) | (0.061) | (0.086) | (0.048) | (0.089) |  | (0.389) | (0.494) | (1.116) | (0.673) | (0.400) |
| Observations | 5,470 | 2,820 | 1,730 | 2,550 | 2,470 |  | 5,470 | 2,820 | 1,730 | 2,550 | 2,470 |
| R-squared | 0.206 | 0.223 | 0.205 | 0.245 | 0.177 |  |  |  |  |  |  |
| Notes: Standard errors are clustered by school. All regressions are weighted by ECLS-K provided weights and condition on school-by-year fixed effects and the full set of controls described in the text and summarized in Table 1. Logit models are estimated using the Chamberlain (1980) conditional (FE) logit estimator, which drops units for which there is no variation in the dependent variable, and logit coefficients are reported. LPM = Linear Probability Model. *** p<0.01, ** p<0.05, * p<0.1. | | | | | | | | | | | |
